# Supplementary material for: Oral administration ofLactobacillus delbrueckiienhances intestinal immunity through inducing dendritic cell activation in suckling piglets
Source: Royal Society of Chemistry journal article supplement (doi:10.1039/d1fo03864h), 2022-01-01
Supplement: d1fo03864h1.pdf [file d1fo03864h1.pdf]

Oral administration of *Lactobacillus delbrueckii* enhances intestinal immunity through inducing dendritic cell activation in suckling piglets

Wei Peng<sup>1,2</sup>, Yin-Hui Li<sup>1,2</sup>, Guan Yang<sup>3</sup>, Jie-Lin Duan<sup>1,2</sup>, Ling-Yuan Yang<sup>1,2</sup>, Li-Xiang Chen<sup>1,2</sup>, Shu-Ling Hou<sup>1,2</sup>, Xing-Guo Huang<sup>1,2\*</sup>

<sup>1</sup> College of Animal Science and Technology, Hunan Agricultural University, Changsha Hunan 410128, China

<sup>2</sup> Engineering Research Center for Feed Safety and Efficient Utilization of Education, Changsha Hunan 410128, China

<sup>3</sup> Department of Infectious Diseases and Public Health, City University of Hong Kong, Kowloon, Hong Kong

Correspondence should be addressed to Xingguo Huang; hxg68989@hunau.edu.cn

Supplementary Table 1 ELISA kit's information

| ELISA kit     | 货号 Item No. |
|---------------|-------------|
| CCL20         | SEA095Po    |
| CX3CL1        | ab192145    |
| IL-2          | SEA073Po    |
| IL-4          | CSB-E06785p |
| IL-10         | CSB-E06779p |
| IL-12         | CSB-E11341p |
| TNF- $\alpha$ | CSB-E04741m |
| IFN- $\gamma$ | CSB-E06794p |

Supplemental Table 2 Primers used for quantitative real-time PCR

| Gene                              | Primer sequence (5'-3')  |
|-----------------------------------|--------------------------|
| <i>Cx3cr1-F</i>                   | CAACCCCTTTATCTACGCCTT    |
| <i>Cx3cr1-R</i>                   | GACCCATCTCCCTCGCTTG      |
| <i>Ccr6-F</i>                     | CGTGTGTATGCGTTTATTGGA    |
| <i>Ccr6-R</i>                     | CGACGGTCTCACTGGTCTGC     |
| <i><math>\beta</math>-actin-F</i> | CATCCTGCGTCTGGACCTGG     |
| <i><math>\beta</math>-actin-R</i> | TAATGTCACGCACGATTTCC     |
| <i>Cx3cl1-F</i>                   | ATCGAGCTATCTTATACAGGG    |
| <i>Cx3cl1-R</i>                   | GGAAGTACTCCTTTGCCAT      |
| <i>Ccl20-F</i>                    | GCAGCTCTCATTTTCCATACAGT  |
| <i>Ccl20-R</i>                    | TTCCCGAGTAGCAGATGACCA    |
| <i>Cd80-F</i>                     | AGGTGTGGCCCAAGTATGAG     |
| <i>Cd80-R</i>                     | CTCTCCCGCTTCTGAACAAC     |
| <i>Cd86-F</i>                     | TCAGGGTGTCTCTTCCCATC     |
| <i>Cd86-R</i>                     | CACAGGTGGCTTTGCATCTA     |
| <i>MHC-II-F</i>                   | TGACACTCCAAGCAAGCATC     |
| <i>MHC-II-R</i>                   | CTGAACCAGGAGCAAAGGAG     |
| <i>Tlr2-F</i>                     | ATATTTGAACTTATCCAGCACGAG |
| <i>Tlr2-R</i>                     | GGCAGACTCAAAGAAAACGA     |
| <i>Tlr4-F</i>                     | TAGAGGACTTCCCCATTGGAC    |
| <i>Tlr4-R</i>                     | ATGTAGAACCTGCAAGTGTT     |
| <i>MyD88-F</i>                    | ATGTCAGGCATCACCATTGAG    |
| <i>MyD88-R</i>                    | ACTTCAGCCGATAGTTGGTCT    |
| <i>Trif-F</i>                     | TGCAGGACGCCATAGACCAC     |
| <i>Trif-R</i>                     | CTCATCATGGCTTGGTTCACCT   |
| <i>Rela-F</i>                     | CTCACCCATCTTTGACAACCG    |
| <i>Rela-R</i>                     | GGCCCGTGAAATACACCTCGAT   |
| <i>AP-1-F</i>                     | CGTCCACCGCCAACATGC       |
| <i>AP-1-R</i>                     | ACGTTTGCAACTGCTGCGTTA    |
| <i>Irf-3-F</i>                    | GACTTTCCTGAGCCAGACACCT   |
| <i>Irf-3-R</i>                    | CGAGGCCAAGTCCATGCCAC     |

Supplemental Table 3 Antibodies used for immunoblot

| Antibodies               | Catalog number |
|--------------------------|----------------|
| TLR2                     | 17236-1-AP     |
| TLR4                     | ab8376         |
| MYD88                    | ab2068         |
| TRIF                     | ab205363       |
| ERK                      | 16443-1-AP     |
| p-ERK                    | ab201015       |
| JNK                      | 51151-1-AP     |
| p-JNK                    | ab124956       |
| p38                      | 14064-1-AP     |
| p-p38                    | ab47363        |
| I $\kappa$ B- $\alpha$   | 10268-1-AP     |
| p-I $\kappa$ B- $\alpha$ | ab133462       |
| IRF3                     | ab68481        |
| p-IRF-3                  | #29047         |
| p65                      | 10745-1-AP     |
| p-p65                    | ab86299        |
| AP-1                     | 10024-2-AP     |
| $\beta$ -actin           | 60008-1-Ig     |

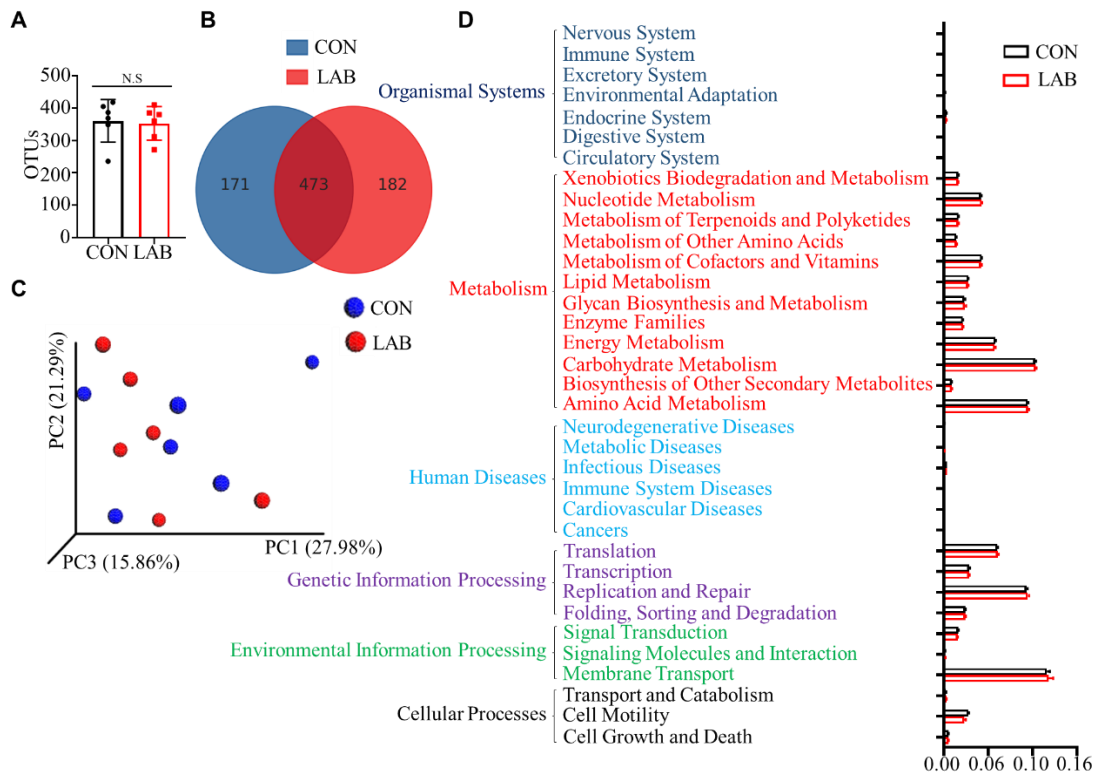

### Supplemental Figure 1 Related to Figure 2

(A) OTUs of microbiota in colon of piglets from CON and LAB group. (B) Venn diagram of bacterial communities in colon of piglets. (C) Three-dimensional (3D) PCA analysis from each sample in colon of piglets. (D) PICRUSt analysis evaluates the predictive functional profiling of microbial communities in colon of piglets from CON and LAB group. Bar graphs show mean  $\pm$  SEM. N.S  $P > 0.05$ , \*  $P < 0.05$ , \*\*  $P < 0.01$ .

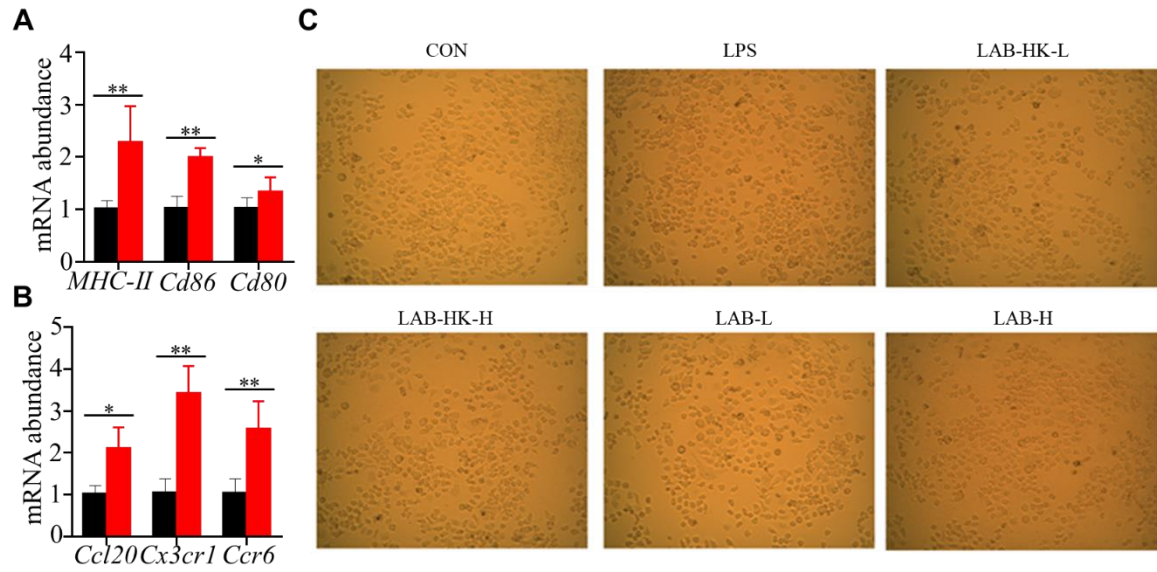

### Supplemental Figure 2 Related to Figure 3

(A and B) The mRNA abundance of *CD80*, *CD86*, *MHC-II* (A) and *Ccl20*, *Ccr6*, *Cx3cr1* (B) in jejunum of piglets from CON and LAB group. (C) The growth and morphology of DC2.4 cell LPS, low dose of heat-killed (LAB-HK-L) and live LAB (LAB-L) (MOI=1), and high dose of heat-killed (LAB-HK-H) and live LAB (LAB-H) (MOI=10). Bar graphs show mean  $\pm$  SEM. N.S  $P > 0.05$ , \*  $P < 0.05$ , \*\*  $P < 0.01$ .

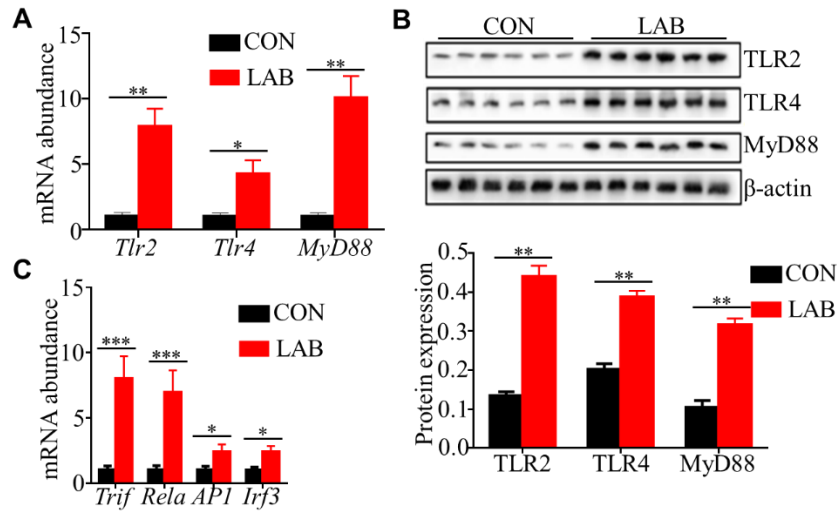

### Supplemental Figure 3 Related to Figure 4

(A and B) The expression of TLR2, TLR4, and MyD88 at mRNA (A) and protein (B) levels in jejunum of piglets from CON and LAB group. (C) The mRNA abundance of *Trif*, *Rela*, *API*, and *Irf3* in ileum of piglets from CON and LAB group. Bar graphs show mean  $\pm$  SEM. N.S  $P > 0.05$ , \*  $P < 0.05$ , \*\*  $P < 0.01$ .

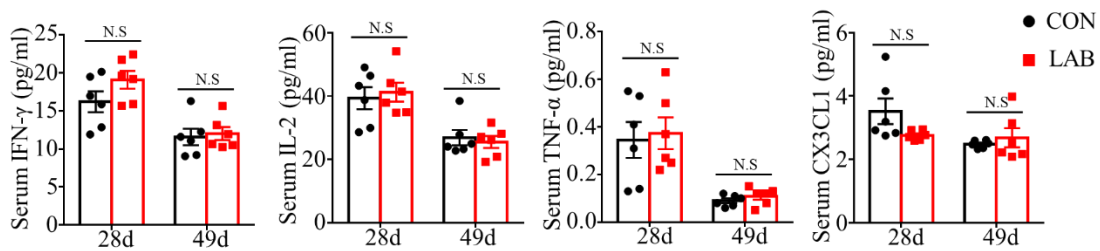

### Supplemental Figure 4 Related to Figure 5

Serum IFN- $\gamma$ , IL-2, TNF- $\alpha$  and CX3CL1 levels in piglets from CON and LAB group.
